1 **Increasing Sample Diversity in Psychiatric Genetics – Introducing a new Cohort of**  
2 **Patients with Schizophrenia and Controls from Vietnam – Results from a Pilot Study**

3

4 Nguyen VT<sup>a,b\*</sup>, Braun A<sup>c\*</sup>, Kraft J<sup>c\*</sup>, Ta TMT<sup>e,g</sup>; Panagiotaropoulou GM<sup>c</sup>, Nguyen VP<sup>a</sup>,  
5 Nguyen TH<sup>a,g</sup>, Trubetsky V<sup>c</sup>, Le CT<sup>a,b</sup>, Le TTH<sup>a,b</sup>, Pham XT<sup>a</sup>, Heuser-Collier I<sup>g</sup>, Lam  
6 NH<sup>f</sup>, Böge K<sup>g</sup>, Hahne IM<sup>g</sup>, Bajbouj M<sup>g</sup>, Zierhut MM<sup>e,g</sup>, Hahn E<sup>g\*</sup>, Ripke S<sup>c,d,\*†</sup>

7

8 **Affiliations**

9 *<sup>a</sup>Department of Psychiatry, Hanoi Medical University, Hà Nội, Việt Nam;*

10 *<sup>b</sup>National Institute of Mental Health, Bach Mai Hospital, Hà Nội, Việt Nam;*

11 *<sup>c</sup>Charité – Universitätsmedizin Berlin, Department of Psychiatry and Psychotherapy,  
12 Campus Charité Mitte, Berlin, Germany;*

13 *<sup>d</sup>Stanley Center for Psychiatric Research, Broad Institute of MIT and Harvard,  
14 Cambridge, MA, United States of America;*

15 *<sup>e</sup>Berlin Institute of Health at Charité – Universitätsmedizin Berlin, BIH Academy, Clinician  
16 Scientist Program;*

17 *<sup>f</sup>Hanoi Mental Hospital, Long Biên, Hà Nội, Việt Nam;*

18 *<sup>g</sup>Charité – Universitätsmedizin Berlin, Department of Psychiatry, Campus Benjamin Franklin,  
19 Berlin, Germany*

20

21 **\* These authors contributed equally to the manuscript**

22

23 **† Corresponding author**

24 Stephan Ripke, Department of Psychiatry, Charité – Universitätsmedizin Berlin, Campus  
25 Mitte, Charitéplatz 1, 10117 Berlin, Germany

26 Phone: +49 30 450 517 030

27 E-Mail: [sripke@broadinstitute.org](mailto:sripke@broadinstitute.org)

28 **Increasing Sample Diversity in Psychiatric Genetics – Introducing a new Cohort of**  
29 **Patients with Schizophrenia and Controls from Vietnam – Results from a Pilot Study**

30

31 **Abstract**

32 **Objectives:** Genome-Wide Association Studies (GWAS) of Schizophrenia (SCZ) have  
33 provided new biological insights; however, most cohorts are of European ancestry. As a result,  
34 derived polygenic risk scores (PRS) show decreased predictive power when applied to  
35 populations of different ancestries. We aimed to assess the feasibility of a large-scale data  
36 collection in Hanoi, Vietnam, contribute to international efforts to diversify ancestry in SCZ  
37 genetic research and examine the transferability of SCZ-PRS to individuals of Vietnamese  
38 Kinh ancestry.

39 **Methods:** In a pilot study, 368 individuals (including 190 SCZ cases) were recruited at the  
40 Hanoi Medical University's associated psychiatric hospitals and outpatient facilities. Data  
41 collection included sociodemographic data, baseline clinical data, clinical interviews assessing  
42 symptom severity and genome-wide SNP genotyping. SCZ-PRS were generated using  
43 different training data sets: i) European, ii) East-Asian and iii) trans-ancestry GWAS summary  
44 statistics from the latest SCZ GWAS meta-analysis.

45 **Results:** SCZ-PRS significantly predicted case status in Vietnamese individuals using mixed-  
46 ancestry ( $R^2$  liability=4.9%,  $p=6.83 \times 10^{-8}$ ), East-Asian ( $R^2$  liability=4.5%,  $p=2.73 \times 10^{-7}$ ) and  
47 European ( $R^2$  liability=3.8%,  $p = 1.79 \times 10^{-6}$ ) discovery samples.

48 **Discussion:** Our results corroborate previous findings of reduced PRS predictive power  
49 across populations, highlighting the importance of ancestral diversity in GWA studies.

50

51 **Keywords:** SCHIZOPHRENIA, GWAS, VIETNAM, EAST-ASIA, POLYGENIC PREDICTION

## 52 **1 Introduction**

53 Schizophrenia (SCZ) is a severe and often chronic psychiatric disorder that consistently  
54 affects between 0,5-1% of the worldwide population (McGrath et al., 2008). It is a clinically  
55 heterogeneous disorder characterised by perceptual distortions such as delusions and  
56 hallucinations, disorganised thinking, negative symptoms including reduced affective  
57 resonance, avolition, lack of motivation, marked cognitive deficits, as well as mood  
58 disturbances (Galderisi et al., 2018). With a high disease burden (GBD 2016 Disease and  
59 Injury Incidence and Prevalence Collaborators, 2017), loss of social functioning, and reduced  
60 life-expectancy (Walker et al., 2015), SCZ has a substantial impact on public health-related  
61 costs (Cloutier et al., 2016). To this date, SCZ remains challenging to treat, as only about  
62 13.5% of patients meet the criteria for full recovery (Charlson et al., 2018), and advances in  
63 treatment options have been hampered — at least in part — by our incomplete knowledge of  
64 SCZ etiology and pathophysiological mechanisms.

65         As with all complex traits and diseases, schizophrenia exhibits a diffuse pattern of  
66 underlying genetic variation in which many common genetic variants contribute to disease  
67 risk. In recent years large-scale genome-wide association studies (GWAS) have provided  
68 robust evidence for many susceptibility loci within the genome (Schizophrenia Working Group  
69 of the Psychiatric Genomics Consortium, 2014); the most recent SCZ GWAS meta-analysis  
70 identified 276 distinct genomic regions (Schizophrenia Working Group of the Psychiatric  
71 Genomics Consortium et al., 2020). While genetic studies can provide insights into the  
72 biological underpinnings of SCZ, they also offer potential biomarkers that could inform  
73 treatment strategies, patient management, prognosis, and possibly early intervention. A  
74 growing number of studies have directed their attention towards the utility of polygenic risk  
75 scores (PRS) in clinical psychiatry. PRS are typically constructed using genome-wide  
76 summary statistics and represent an individual's propensity towards certain traits or disorders  
77 attributable to common genetic variation (International Schizophrenia Consortium et al., 2009).  
78 To establish the clinical relevance of genetic findings, it becomes increasingly important to  
79 invest in large, well-phenotyped SCZ cohorts; especially as patients affected by severe

80 psychotic disorders are often underrepresented in population-based research initiatives (J.  
81 Martin et al., 2016)

82         Although increases in sample size boost statistical power, and consequently the  
83 discovery of novel risk-conferring variants (Levinson et al., 2014) and predictive capacity of  
84 PRS, cohorts of non-European ancestries — especially those from low- and middle-income  
85 countries — are still sparse in GWA studies. Multiple works have demonstrated that the  
86 prediction accuracy of PRS depends on the ancestral composition of discovery cohorts and  
87 their genetic divergence from the target sample (Bigdeli et al., 2020; Lam et al., 2019). As a  
88 result, polygenic scores derived from Eurocentric GWAS suffer from an attenuated predictive  
89 power when transferred to non-European populations (Duncan et al., 2019; A. R. Martin et al.,  
90 2019). Consequently, PRS are less informative for non-European populations; hence, patients  
91 from these populations will benefit less from polygenic scores and their potential applications.  
92 Although there is emerging evidence for a shared genetic architecture of schizophrenia across  
93 diverse populations (Lam et al., 2019), the incomplete transferability of GWAS findings is  
94 driven by three fundamental factors: 1) differences in allele frequencies across populations,  
95 as GWAS are powered only for common variants of small or modest effect-size; 2) differences  
96 in linkage disequilibrium patterns that affect how well causal variants are tagged by genotype  
97 arrays and imputation reference panels; 3) population genetic factors such as genetic drift,  
98 polygenic selection, and demographic history (Duncan et al., 2019; A. R. Martin et al., 2017,  
99 2019). To improve GWAS findings' generalizability, encouraging ancestral diversity in study  
100 samples has taken high priority in the field of psychiatric genetics (Mills & Rahal, 2020).

101         Despite a surge of East-Asian samples in the latest schizophrenia GWAS  
102 (Schizophrenia Working Group of the Psychiatric Genomics Consortium et al., 2020), a  
103 representative Vietnamese cohort is still lacking. To close this gap, we conducted a case-  
104 control pilot study in Hanoi, Vietnam, in which sociodemographic-, genetic-, and clinical data  
105 from a total of 378 participants were collected. Here we provide a first report on data  
106 collection's feasibility while providing insights into clinical data and current treatment of  
107 patients with schizophrenia recruited in Hanoi, Vietnam. Moreover, we aim to facilitate genetic

108 discoveries by contributing to global research endeavors to diversify genetic samples and  
109 clinical data in schizophrenia research. Ultimately, this pilot study sets the foundation for the  
110 recruitment of a sizeable Vietnamese well characterized cohort that includes state-of-the-art  
111 phenotyping procedures in the field of psychiatric genetics.

112

## 113 **2 Methods**

### 114 ***2.1 Local Recruitment and Data Collection***

115 For this pilot study, 190 patients with schizophrenia and 188 control subjects, all of Vietnamese  
116 Kinh ancestry, were recruited between August and December 2017. All participants were at  
117 least 18 years old and provided full written informed consent upon study enrollment. Before  
118 data collection, study procedures were reviewed and approved by the institutional ethical  
119 review board of the Hanoi Medical University. All in-patients were recruited at teaching  
120 hospitals of the Department of Psychiatry at Hanoi Medical University.

121 Additionally, outpatients were recruited from associated community medical centers around  
122 the Hanoi metropolitan area. In outpatient facilities, data collection was supervised by senior  
123 psychiatrists of the staff at the Department of Psychiatry, Hanoi Medical University. Diagnosis  
124 of schizophrenia according to ICD-10 criteria (F20.X) was ascertained by clinicians with at  
125 least three years of psychiatric experience and confirmed by a senior attending psychiatrist.  
126 Current symptom severity was assessed with the Vietnamese Translation of the Positive and  
127 Negative Syndrome Scale (Kay et al., 1987), which encompasses the dimensions of positive,  
128 negative, and general psychopathology. Each patient was interviewed and rated  
129 independently by two clinicians who received prior training in conducting the semi-structured  
130 interview. If no consensus was reached, ratings were discussed with a senior psychiatrist.  
131 Medical and demographic parameters, including medication, duration of illness, and age at  
132 onset, were recorded during routine examinations and/or extracted from the patients' medical  
133 chart. Control subjects were recruited from the staff at the Hanoi Medical University across  
134 different occupational groups. To obtain genetic information, saliva samples were collected

135 from each subject using OraGene-510 DNA-Self-Collection Kits (Genotek, Ottawa, Ontario,  
136 Canada) according to the manufacturer's instructions.

137

## 138 **2.2 Genetic Data**

### 139 *2.2.1 Genome-wide Genotyping*

140 Genetic material was extracted from saliva following established standard protocols. Genome-  
141 wide genotyping of DNA samples was performed on Infinium Global Screening array-23  
142 (GSA) MD BeadChip (Illumina, San Diego, CA) at ERASMUS Medical Center, Human  
143 Genotyping Facility (HuGe-F), Rotterdam, Netherlands. SNP-level data was analyzed using a  
144 central pipeline 'RICOPILI' (Lam et al., 2020) on the LISA computer cluster.

145

### 146 *2.2.2 Quality Control*

147 According to the Psychiatric Genomics Consortium (PGC) standards, quality control was  
148 performed on the newly recruited cohort. The default quality control parameters for retaining  
149 subjects and SNPs were: SNP missingness  $< 0.05$  (before sample removal); subject  
150 missingness  $< 0.02$ ; autosomal heterozygosity deviation ( $| F_{\text{het}} | < 0.2$ ); SNP missingness  $<$   
151  $0.02$  (after sample removal); difference in SNP missingness between cases and controls  $<$   
152  $0.02$ ; and SNP Hardy-Weinberg equilibrium ( $P > 10^{-6}$  in controls or  $P > 10^{-10}$  in cases). Seven  
153 individuals who did not meet QC criteria were excluded resulting in a data set of 370 individuals  
154 (184 cases and 186 controls) and 367,920 SNPs. Post-QC Manhattan and QQ plots did not  
155 show unexpected genome-wide significant association or general inflation.

156

### 157 *2.2.3 Genotype Imputation*

158 Genotype imputation was performed using the pre-phasing/imputation stepwise approach  
159 implemented in EAGLE/MINIMAC3 (with a variable chunk size of 132 genomic chunks and  
160 default parameters). The imputation reference set consisted of 54,330 phased haplotypes with  
161 36,678,882 variants from the publicly available HRC reference release 1.1 (McCarthy et al.,  
162 2016).

#### 163 2.2.4 Population Stratification and Relatedness Testing

164 After imputation, we identified SNPs with very high imputation quality (INFO >0.8) and low  
165 missingness (<1%) for further quality control. After linkage disequilibrium pruning ( $r^2 > 0.02$ )  
166 and frequency filtering (MAF > 0.05), there were 116,203 autosomal SNPs in the data set.  
167 This SNP set was used for robust relatedness testing and population structure analysis using  
168 PLINK (Purcell et al., 2007). Thirteen pairs of subjects with identity-by-descent PI-HAT value  
169 of > 0.2 were identified. One member of each pair was removed at random after preferentially  
170 retaining cases over controls. Principal component estimation was done with the same  
171 collection of autosomal SNPs, and fifteen ancestry outliers were removed from the data set  
172 (see supplementary figures S2-S3). Supplementary figure S3 (A) shows that Vietnamese  
173 individuals cluster within other Asian populations from the 1000 Genomes reference  
174 population (Auton et al., 2015). Figure S3 (B) illustrates that the Vietnamese Kinh population  
175 is distinctly stratified from China and Japan when plotted only against Asian populations. We  
176 tested the first 20 principal components for phenotype association (using logistic regression  
177 with study indicator variables included as covariates). Seven principal components, namely  
178 PC1, PC2, PC3, PC4, PC5, PC8, and PC14, were significantly associated ( $P < 0.05$ ) with SCZ  
179 status, and these were added to the GWAS model as covariates in order to control for  
180 population stratification. The final analysis consisted of 343 individuals (174 cases and 169  
181 controls) and 8,332,179 SNPs. We tested all SNPs for association under an additive logistic  
182 regression model using PLINK and the derived principal components as covariates.

183

#### 184 2.2.5 Polygenic Risk Scoring

185 We obtained summary statistics from the latest PGC schizophrenia GWAS (Schizophrenia  
186 Working Group of the Psychiatric Genomics Consortium et al., 2020) to calculate PRS for  
187 individuals in our target data set. Polygenic scoring was performed using (a) East-Asian (EAS)  
188 specific meta-analysis (14,004 cases and 16,757 controls), (b) European (EUR) specific meta-  
189 analysis (53,386 cases and 77,258 controls) and (c) trans-ancestry (MIX) meta-analysis  
190 (67,390 cases and 94,015 controls) as training statistics. Genome-wide summary statistics

191 were LD pruned and “clumped” by discarding variants within 500 kb of, and in  $r^2 \geq 0.1$  with  
192 another (more significant) marker, resulting in 61 805 (EAS), 90,713, (EUR) 87,671 variants  
193 (MIX), respectively. Clumping for the East-Asian ancestry was conducted with the LD  
194 information of the East-Asian subset of the HRC reference panel. The EUR and MIX training  
195 data were clumped using LD information from the entire HRC reference panel. This set of LD-  
196 independent SNPs was used to construct a PRS at a range of P-value thresholds ( $5 \times 10^{-8}$ ,  
197  $1 \times 10^{-6}$ ,  $1 \times 10^{-4}$ , 0.001, 0.01, 0.05, 0.1, 0.2, 0.5, 1.0). For a given sample, we take each LD-  
198 independent SNP and multiply the marginal SNP effect from the logistic regression by the  
199 number of risk alleles. The resulting products were summed over all variants for each  
200 individual so that a single score reflecting the overall polygenic burden for schizophrenia is  
201 obtained.

202

### 203 *2.2.6 Consistency of Directions of Effects*

204 In an additional final step, we assessed the robustness of genetic associations in the  
205 Vietnamese pilot sample by performing a replication analysis using the PGC trans-ancestry  
206 discovery sample as a discovery data set. We used a binomial sign test to establish that SNP  
207 associations replicated *en masse* in an independent PGC sample at various p-value  
208 thresholds by showing that the number of concordant effect directions for index SNPs was  
209 significantly greater than the null hypothesis of randomly oriented effects. The Vietnam  
210 summary statistics were then combined with those from the PGC primary GWAS dataset using  
211 an inverse variance-weighted fixed effects model and overlapping LD-clumps were merged  
212 into distinct genomic regions.

213

### 214 **2.3 Polygenic Association Testing**

215 Individual-level PRS at each p-value threshold ( $P_d$ ) were tested for association with SCZ  
216 status (Schizophrenia vs. No Schizophrenia) in logistic regression models. To adjust for fine-  
217 grained, population-stratification principal components (PCs) 1, 2, 3, 4, 5, 8, and 14 (selected  
218 for being significantly associated with SCZ status) were included as covariates in each model.



219 Nagelkerke's  $R^2$ , as a measure of "variance explained" for logistic regression, was determined  
220 by comparing the full model (with PRS and PCs) against the null model containing only PCs.  
221 We report Nagelkerke's  $R^2$  on the liability scale (Lee et al., 2012), which corrects for a higher  
222 case-control-ratio in the target dataset relative to the general population's prevalence  
223 estimated 0.7% (McGrath et al., 2008). Using LD-clumped genome-wide summary statistics  
224 without any p-value filter, individuals were grouped into five quintiles based on their individual  
225 polygenic burden (SCZ-PRS). Odds ratios for schizophrenia diagnosis were obtained by  
226 comparing individuals with low polygenic risk (bottom 20%, or bottom quintile) to individuals in  
227 strata with increased polygenic loadings for SCZ (second to the fifth quintile). Each step was  
228 repeated for three different training data sets: East-Asian GWAS (EAS), European GWAS  
229 (EUR), and mixed-ancestry GWAS (PGC3 SCZ-GWAS).

230

### 231 **3 Results**

#### 232 **3.1 Sample Characteristics**

233 A total of 378 participants were included in the study, of which 190 are cases diagnosed with  
234 schizophrenia and 188 are control subjects. Sociodemographic parameters of all case and  
235 control subjects are shown in Table 1. All clinical parameters of the case sample are presented  
236 in Table 2.

237

#### 238 **3.2 Polygenic Risk Profiling**

239 Next, we assessed how much variance in schizophrenia risk could be attributed to underlying  
240 genetic variation. After quality control (see **Supplementary** material), 343 individuals  
241 remained for polygenic risk score analysis. Schizophrenia polygenic risk scores (SCZ-PRS)  
242 were generated with GWAS summary statistics from East-Asian (EAS), European (EUR), and  
243 mixed-ancestry populations as training sets. In line with previous findings, individual-level  
244 SCZ-PRS were significantly associated with schizophrenia case status (**Fig 1**,  
245 **Supplementary Table S1**). However, the predictive accuracy of SCZ-PRS among  
246 Vietnamese participants varied with the ancestral composition of the training data sets. The

247 strongest effect sizes were observed when PRS were derived from trans-ancestry summary  
248 statistics, which explained ~4.9 % of the variance in schizophrenia liability ( $p = 6.83 \times 10^{-8}$  at  
249  $P_d < 1$ ). Likewise, PRS constructed on East-Asian GWAS summary statistics (PGC SCZ wave  
250 3) accounted for ~4.5 % of the variability in schizophrenia risk ( $p = 2.73 \times 10^{-7}$  at  $P_d < 1$ ). PRS  
251 trained on European ancestry GWAS results also predicted SCZ status in the Vietnamese  
252 target sample with an explained variance of only ~3.9 % ( $p = 1.79 \times 10^{-6}$  at  $P_d < 0.01$ ). As  
253 expected, best overall predictions were observed at more inclusive p-value thresholds that  
254 capture a larger proportion of the polygenic signal by including more independent common  
255 variants below the genome-wide significance level.

256 A similar pattern can be observed when inspecting odds ratios for the association  
257 between SCZ-PRS and schizophrenia diagnosis (**Fig 1c, Supplementary Table S3**). Overall,  
258 individuals who carry a higher polygenic burden are at higher odds for having a schizophrenia  
259 diagnosis, ORs range from 1.97 (95% CI, 0.96 - 4.12) at the second PRS-quintile up to 5.74  
260 (95% CI, 2.70 - 12.69) at the fifth PRS-quintile, using the first quintile as the reference group  
261 and mixed-ancestry training populations for polygenic scoring. When considering scores  
262 obtained from east-Asian ancestry GWAS, odds ratios for SCZ are slightly lower, ranging from  
263 1.50 (95% CI, 0.72 - 3.14) at the second PRS-quintile up to 4.47 (95% CI, 2.13 – 9.66) at the  
264 top PRS-quintile. By comparison, observed ORs are markedly lower for EUR-derived SCZ-  
265 PRS; the OR at the fifth PRS quintile is 3.39 (95% CI, 1.63 – 7.26) relative to the first PRS  
266 quintile.

267 Overall, reported predictive values of PRS and odds ratios at the top PRS-quintile in  
268 our Vietnamese sample are consistent with those of other East-Asian cohorts reported within  
269 the latest SCZ GWAS meta-analysis (Schizophrenia Working Group of the Psychiatric  
270 Genomics Consortium, 2020).

271

### 272 **3.3 Replication Analysis**

273 Complementing PRS association testing, we explored if SNP associations at varying p-value  
274 thresholds ( $P_d$ ) in the mixed-ancestry SCZ3-GWAS replicate in the present Vietnamese-

275 ancestry sample (replication data set). We observed that the fraction of SNPs with directions  
276 of effect congruent to the replication data set was consistently greater than 50%. Specifically,  
277 of the 182 index SNPs that attained genome-wide significance in the SCZ3-GWAS meta-  
278 analysis and that were also available in the Vietnamese cohort, 110 SNPs (60%) showed the  
279 same direction of effect, which was significantly greater than expected by chance (binomial p-  
280 value = 0.003). Results of the replication analysis and binomial sign test across different p-  
281 value thresholds are reported in the supplementary material (**Supplementary Table S3**).  
282 When meta-analyzed with SCZ3-GWAS, 249 loci reach genome-wide significance, in contrast  
283 to 244 loci identified by SCZ3-GWAS alone, indicating that by adding this or a potentially larger  
284 Vietnamese cohort could help to discover novel SCZ-associated loci in future GWAS meta-  
285 analysis.

286

#### 287 **4 Discussion**

288 With this pilot study, the feasibility of a large-scale data collection of patients diagnosed with  
289 schizophrenia in Vietnam has been shown for the first time. We were able to implement a  
290 successful recruitment scheme at the Department of Psychiatry of the Hanoi Medical  
291 University, with the National Institute of Mental Health staff at Bach Mai Hospital and the Hanoi  
292 Psychiatric Hospital participating in data collection. This study established an efficient pipeline  
293 for data generation and subsequent analyses that will be upscaled with future collaborative  
294 endeavors. With these central foundations set in place, we aim to continue and intensify our  
295 data collection efforts and establish more in-depth phenotyping going forward.

296         There are a few practical and clinical considerations concerning the recruitment of  
297 patients with schizophrenia in Vietnam. First, patients were primarily recruited through in-  
298 patient facilities. For genetic research, that may prove to be an advantage since the clinical  
299 population in Vietnam comprises mostly cases with severe illness courses of schizophrenia,  
300 long duration of illness, multiple prior hospitalizations, and a high symptom load, especially for  
301 negative and residual symptoms (Maramis et al., 2011). This pattern can be considered  
302 representative of inpatients often treated for long durations for chronic symptoms of

303 schizophrenia in Vietnam, since individuals with a less severe course of illness typically won't  
304 seek or receive hospital treatment due to stigma or a lack of illness recognition for less severe  
305 illness courses (Martensen et al., 2020; Nguyen et al., 2019; Ta et al., 2016, 2018). This  
306 pattern is reflected by the fact that even today, more than 50% of all patients treated in  
307 psychiatric hospitals in Vietnam have a primary psychiatric diagnosis of schizophrenia  
308 (Maramis et al., 2011; Martensen et al., 2018, 2020). In our pilot sample, most of the patients  
309 were hospitalised several times due to schizophrenia. Nearly all patients, including the  
310 outpatients, still exhibited chronic, residual, or negative symptoms when assessed by the  
311 PANSS at the time of recruitment. To increase clinical heterogeneity among patients, we will  
312 integrate more outpatient facilities in the Hanoi metropolitan area as additional study sites in  
313 future studies.

314         In the PRS and replication analysis, we corroborated some key findings of previous  
315 publications. First, we observed that PRS derived from trans-ancestry GWAS perform better  
316 than EAS-derived PRS, and both predict schizophrenia more accurately than EUR-derived  
317 PRS. Similarly, leave-one-out PRS analysis in the latest SCZ GWAS meta-analysis  
318 demonstrated that PRS in Asian cohorts explained consistently more variance in  
319 schizophrenia risk when mixed-ancestry summary statistics were used for polygenic scoring  
320 compared to Asian training populations (Schizophrenia Working Group of the Psychiatric  
321 Genomics Consortium et al., 2020). Consistent with this finding, Lam et al. (2019)  
322 demonstrated that EUR-derived PRS accounted for less variance in schizophrenia liability  
323 than EAS-derived PRS. Second, we demonstrated that risk-conferring SNPs in the present  
324 Vietnamese samples largely showed same-direction effects compared to SCZ PGC3  
325 summary statistics. The inclusion of our sample, especially after scaling-up the sample size,  
326 will probably uncover novel susceptibility loci, especially since an earlier meta-analysis of  
327 East-Asian (Lam et al., 2019) and Latino and admixed African samples (Bigdeli et al., 2020)  
328 strongly support this notion. Due to practical limitations, we focused on Kinh ancestry  
329 individuals, representing 87% of the Vietnamese population. Given the genetic diversity  
330 among Vietnamese populations (Macholdt et al., 2020), our genotyping initiative might be

331 extended to other ethnic groups living in Vietnam and bordering geographical areas in South-  
332 East-Asia. Thus, the addition of currently understudied populations such as Vietnamese  
333 ethnicities will likely help refine our understanding of the genetic architecture of schizophrenia.

334 Ancestral diversity among study participants in discovery GWAS has a substantial  
335 impact on prediction accuracy of polygenic scores and their applicability across populations.  
336 Further inclusion of East- and South-East-Asian cohorts will likely improve the polygenic risk  
337 prediction in Vietnamese individuals and vice versa, more than by a comparable addition of  
338 European ancestry samples. This is increasingly important as PRS are beginning to find their  
339 way into clinical practice outside of psychiatry. Beyond disease risk prediction, the clinical  
340 utility of PRS may range from genotype-informed screening methods and stratification to  
341 tailored intervention strategies (Torkamani et al., 2018). To translate genome-wide data into  
342 clinically actionable information, in-depth clinical and valid phenotypic information must be  
343 collected along with genetic data. While these pilot data are too small to perform meaningful  
344 secondary analyses, e.g., on symptom profiles, such cohorts will play a pivotal role in making  
345 potential PRS-based applications available for a wider population.

346

## 347 **5 Conclusion and Outlook**

348 This pilot research project's main objective was to establish key research and clinical  
349 infrastructures for a larger cross-sectional Vietnamese cohort of patients with schizophrenia  
350 and healthy controls. In the next phase, we will extend our data collection efforts by introducing  
351 additional study sites in Vietnam, both in northern and southern provinces, as well as a  
352 translated and validated comprehensive phenotyping battery. This includes trained  
353 assessment, that is harmonised with our current research initiative in Berlin, Germany. This  
354 assessment is comprised of an in-depth neuropsychological evaluation and a selection of  
355 questionnaires that assess environmental risk factors, a broad range of health-related data,  
356 as well as outcome measures such as quality of life and social functioning. With this  
357 prospective cohort, we intend to build a valuable resource for trans-ancestry GWAS and  
358 secondary analyses on cross-cultural gene-environment interactions to elucidate potential

359 etiological trajectories associated with an increased liability to Schizophrenia. In doing so, we  
360 aim to contribute to a worldwide endeavor to enhance well-powered and ancestrally diverse  
361 GWAS samples and explore trans-ancestry and culture specific gene-environment  
362 interactions in psychiatry.

## **Acknowledgements**

We thank the Schizophrenia Working Group of the Psychiatric Genomics Consortium for granting permission to use European, East-Asian and trans-ancestry GWAS summary statistics (wave 3) for this study. The Stanley Center for Psychiatric Research financially supported the collection of this sample. The statistical analysis was carried out on the Dutch LISA computer cluster powered by SURFsara. We further thank the participants and additional staff of Hanoi Psychiatric Hospital, Hanoi Medical University, and the National Institute of Mental Health, Vietnam, for taking part in this study.

## **Disclosure of interest**

None of the authors involved in this manuscript report conflicts of interest.

**Table 1.** Sociodemographic characteristics of the health control and patient sample

|                               |                      | <b>Vietnamese sample (N=378)</b> |                         |
|-------------------------------|----------------------|----------------------------------|-------------------------|
|                               |                      | <b>Patients (N=190)</b>          | <b>Controls (N=188)</b> |
| <b>Age [years]</b>            | Mean (SD)            | 44.44 (10.62)                    | 44.21 (10.43)           |
| <b>Sex (%)</b>                |                      |                                  |                         |
|                               | Male                 | 147 (77.37)                      | 134 (71.28)             |
|                               | Female               | 43 (22.63)                       | 54 (28.72)              |
| <b>Weight [kg]</b>            | Mean (SD)            | 57.92 (9.81)                     | 62.46 (8.97)            |
| <b>Height [cm]</b>            | Mean (SD)            | 162.45 (7.35)                    | 164.34 (7.14)           |
| <b>BMI [kg/m<sup>2</sup>]</b> | Mean (SD)            | 21.90 (3.33)                     | 23.06 (2.40)            |
| <b>Marital Status (%)</b>     |                      |                                  |                         |
|                               | Single               | 97 (51.32)                       | 9 (4.86)                |
|                               | Married              | 58 (30.69)                       | 172 (92.97)             |
|                               | Living separately    | 10 (5.29)                        | 1 (0.54)                |
|                               | Divorced             | 21 (11.11)                       | 0 (0.00)                |
|                               | Widowed              | 3 (1.59)                         | 3 (1.62)                |
| <b>School Education (%)</b>   |                      |                                  |                         |
|                               | Illiterate           | 2 (1.06)                         | 0 (0.00)                |
|                               | Primary School       | 29 (15.4)                        | 1 (0.53)                |
|                               | Secondary School     | 59 (31.38)                       | 21 (11.23)              |
|                               | High School          | 100 (53.19)                      | 165 (88.24)             |
| <b>Higher Education (%)</b>   |                      |                                  |                         |
|                               | Apprentice           | 12 (27.91)                       | 6 (4.32)                |
|                               | Under-College        | 9 (20.93)                        | 40 (28.78)              |
|                               | College / University | 22 (51.65)                       | 67 (48.22)              |
|                               | Post-University      | 0 (0.00)                         | 26 (18.71)              |



**Table 2.** Clinical parameters

|                                           |                                   | <b>N (%)</b> | <b>Mean (SD)</b> |
|-------------------------------------------|-----------------------------------|--------------|------------------|
| <b>Clinical information</b>               |                                   |              |                  |
| Duration of illness [years]               |                                   |              | 18.72 (10.09)    |
| Average age of onset of positive symptoms |                                   |              | 25.55 (7.52)     |
| No. of hospitalisations <sup>1</sup>      |                                   |              | 11.51 (15.50)    |
| Positive Family History <sup>2</sup>      | at least 1 family member affected | 54 (28.42)   |                  |
| Recruitment site                          | Inpatients                        | 96 (50.53)   |                  |
|                                           | Outpatients                       | 94 (49.47)   |                  |
| <b>Treatment</b>                          |                                   |              |                  |
| Antipsychotic Medication <sup>3</sup>     | Olanzapine                        | 59 (31.05)   |                  |
|                                           | Risperidone                       | 14 (7.37)    |                  |
|                                           | Clozapine                         | 12 (6.32)    |                  |
|                                           | Haloperidol                       | 7 (3.68)     |                  |
|                                           | Chlorpromazine                    | 11 (5.79)    |                  |
|                                           | Levomepromazine                   | 68 (35.79)   |                  |
|                                           | Other antipsychotics              | 17 (9.45)    |                  |
| <b>Symptom severity</b>                   |                                   |              |                  |
| Symptoms within the last year             | Complete remission                | 1 (0.53)     |                  |
|                                           | Currently symptomatic             | 188 (98.95)  |                  |
| PANSS                                     | PANSS-Pos                         |              | 14.80 (6.50)     |
|                                           | PANSS-Neg                         |              | 24.42 (8.81)     |
|                                           | PANSS-Gen                         |              | 34.01 (12.08)    |
|                                           | PANSS-Total                       |              | 73.12 (22.52)    |
| Domains of psychopathology                | Delusions                         | 75 (39.47)   |                  |
|                                           | Hallucinations                    | 80 (42.11)   |                  |
|                                           | Disorganisation                   | 77 (40.53)   |                  |
|                                           | Catatonia                         | 21 (11.05)   |                  |
|                                           | Negative symptoms                 | 189 (99.47)  |                  |
|                                           | Hostile behavior                  | 58 (30.53)   |                  |
|                                           | Marked affective symptoms         | 21 (11.05)   |                  |
|                                           | Other psychopathological symptoms | 5 (2.63)     |                  |

<sup>1</sup> Number of lifetime in-patient admissions due to schizophrenia

<sup>2</sup> Family history of psychiatric illnesses

<sup>3</sup> All patients received at least one antipsychotic medication

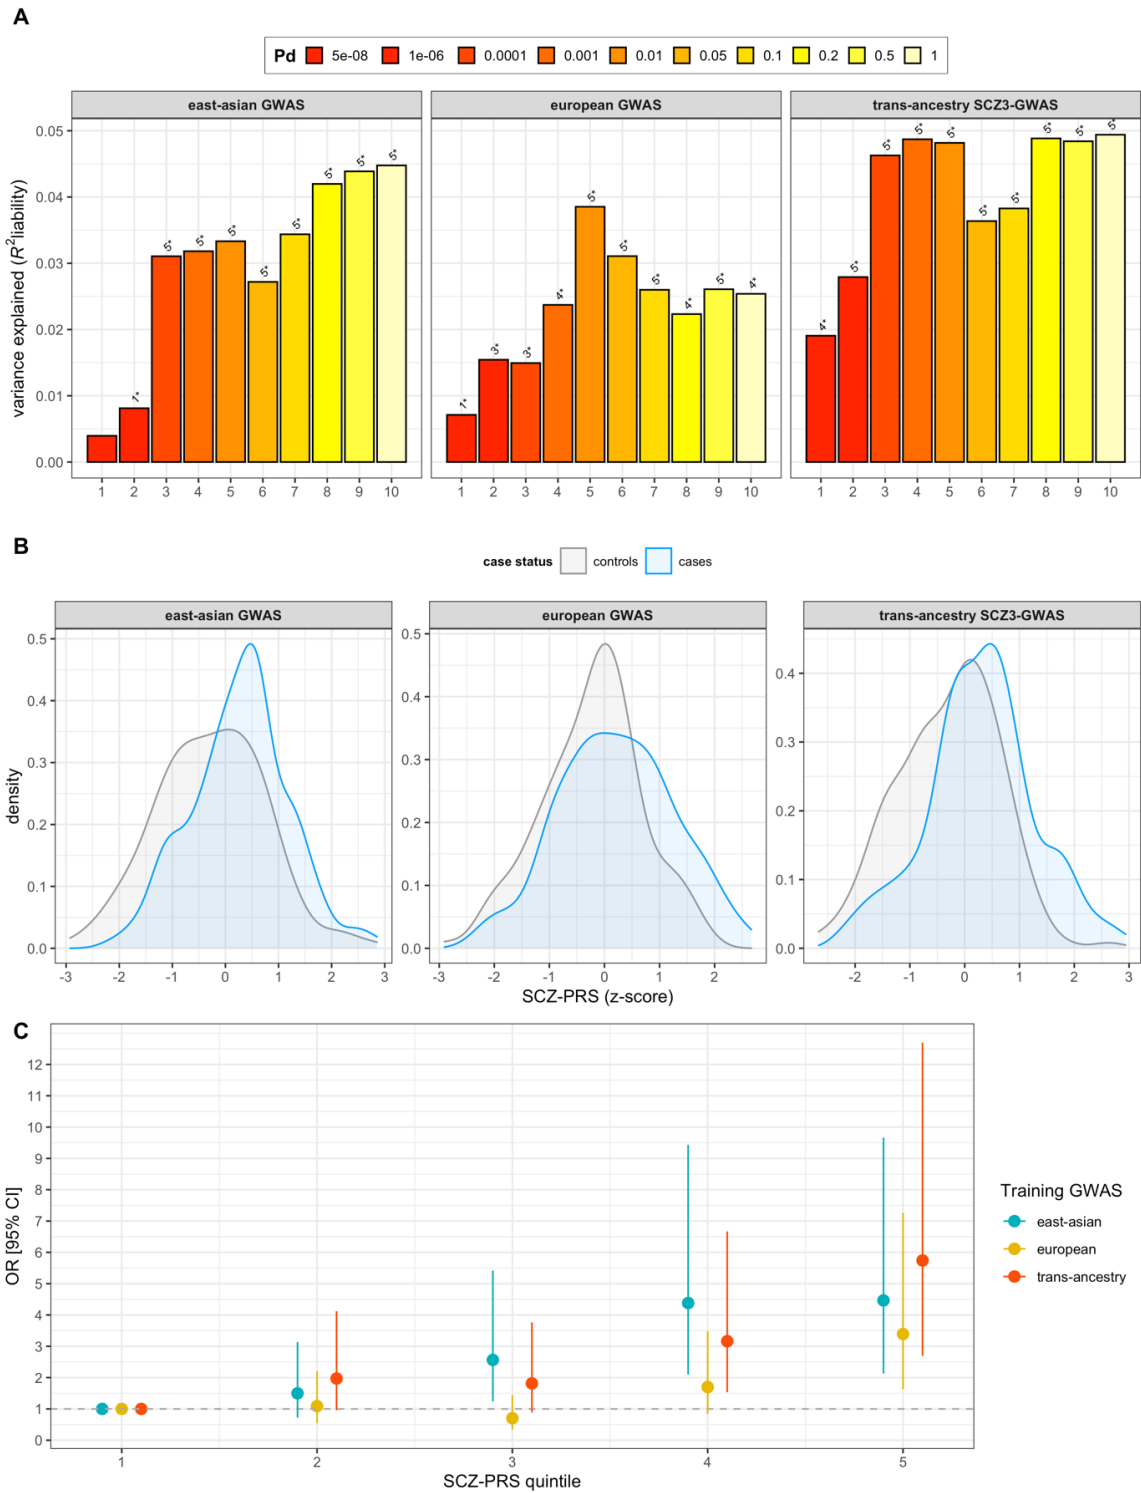

**Fig 1.** Associations of SCZ-PRS with schizophrenia in a cohort of 169 controls and 174 cases of Vietnamese Kinh ancestry. **A)** The variance explained ( $R^2$  liability) by SCZ-PRS at different p-value thresholds (Pd; x-axis) is shown on the y-axis. P-values are displayed on top of each bar: 1\*  $< 0.05$ , 2\*  $< 0.01$ , 3\*  $< 0.005$ , 4\*  $< 0.001$ , 5\*  $< 1 \times 10^{-4}$ . SCZ-PRS were constructed on different GWAS discovery samples: East-Asian GWAS (left panel), European-ancestry GWAS (center panel), and trans-ancestry SCZ3-GWAS (right panel). **B)** Distribution of z-transformed polygenic risk scores among cases and controls at Pd  $< 1$ . **C)** odds ratios for schizophrenia per SCZ-PRS (Pd  $< 1$ ) quintile relative to the first quintile. Error bars represent 95% Confidence Intervals.

## References

- Auton, A., Abecasis, G. R., Altshuler, D. M., Durbin, R. M., Abecasis, G. R., Bentley, D. R., Chakravarti, A., Clark, A. G., Donnelly, P., Eichler, E. E., Flicek, P., Gabriel, S. B., Gibbs, R. A., Green, E. D., Hurles, M. E., Knoppers, B. M., Korbel, J. O., Lander, E. S., Lee, C., ... National Eye Institute, N. (2015). A global reference for human genetic variation. *Nature*, *526*(7571), 68–74. <https://doi.org/10.1038/nature15393>
- Bigdeli, T. B., Genovese, G., Georgakopoulos, P., Meyers, J. L., Peterson, R. E., Iyegbe, C. O., Medeiros, H., Valderrama, J., Achtyes, E. D., Kotov, R., Stahl, E. A., Abbott, C., Azevedo, M. H., Belliveau, R. A., Bevilacqua, E., Bromet, E. J., Byerley, W., Carvalho, C. B., Chapman, S. B., ... Genomic Psychiatry Cohort (GPC) Consortium. (2020). Contributions of common genetic variants to risk of schizophrenia among individuals of African and Latino ancestry. *Molecular Psychiatry*, *25*(10), 2455–2467. <https://doi.org/10.1038/s41380-019-0517-y>
- Charlson, F. J., Ferrari, A. J., Santomauro, D. F., Diminic, S., Stockings, E., Scott, J. G., McGrath, J. J., & Whiteford, H. A. (2018). Global Epidemiology and Burden of Schizophrenia: Findings From the Global Burden of Disease Study 2016. *Schizophrenia Bulletin*, *44*(6), 1195–1203. <https://doi.org/10.1093/schbul/sby058>
- Cloutier, M., Aigbogun, M. S., Guerin, A., Nitulescu, R., Ramanakumar, A. V., Kamat, S. A., DeLucia, M., Duffy, R., Legacy, S. N., Henderson, C., Francois, C., & Wu, E. (2016). The Economic Burden of Schizophrenia in the United States in 2013. *The Journal of Clinical Psychiatry*, *77*(6), 764–771. PubMed. <https://doi.org/10.4088/jcp.15m10278>
- Duncan, L., Shen, H., Gelaye, B., Meijssen, J., Ressler, K., Feldman, M., Peterson, R., & Domingue, B. (2019). Analysis of polygenic risk score usage and performance in diverse human populations. *Nature Communications*, *10*(1), 3328. <https://doi.org/10.1038/s41467-019-11112-0>
- GBD 2016 Disease and Injury Incidence and Prevalence Collaborators. (2017). Global, regional, and national incidence, prevalence, and years lived with disability for 328 diseases and injuries for 195 countries, 1990-2016: A systematic analysis for the

- Global Burden of Disease Study 2016. *Lancet (London, England)*, 390(10100), 1211–1259. PubMed. [https://doi.org/10.1016/S0140-6736\(17\)32154-2](https://doi.org/10.1016/S0140-6736(17)32154-2)
- International Schizophrenia Consortium, Purcell, S. M., Wray, N. R., Stone, J. L., Visscher, P. M., O'Donovan, M. C., Sullivan, P. F., & Sklar, P. (2009). Common polygenic variation contributes to risk of schizophrenia and bipolar disorder. *Nature*, 460(7256), 748–752. PubMed. <https://doi.org/10.1038/nature08185>
- Kay, S. R., Fiszbein, A., & Opler, L. A. (1987). The Positive and Negative Syndrome Scale (PANSS) for Schizophrenia. *Schizophrenia Bulletin*, 13(2), 261–276. <https://doi.org/10.1093/schbul/13.2.261>
- Lam, M., Awasthi, S., Watson, H. J., Goldstein, J., Panagiotaropoulou, G., Trubetsky, V., Karlsson, R., Frei, O., Fan, C.-C., De Witte, W., Mota, N. R., Mullins, N., Brügger, K., Lee, S. H., Wray, N. R., Skarabis, N., Huang, H., Neale, B., Daly, M. J., ... Ripke, S. (2020). RICOPILI: Rapid Imputation for COnsortias PipeLine. *Bioinformatics*, 36(3), 930–933. <https://doi.org/10.1093/bioinformatics/btz633>
- Lam, M., Chen, C.-Y., Li, Z., Martin, A. R., Bryois, J., Ma, X., Gaspar, H., Ikeda, M., Benyamin, B., Brown, B. C., Liu, R., Zhou, W., Guan, L., Kamatani, Y., Kim, S.-W., Kubo, M., Kusumawardhani, A. A. A. A., Liu, C.-M., Ma, H., ... Huang, H. (2019). Comparative genetic architectures of schizophrenia in East Asian and European populations. *Nature Genetics*, 51(12), 1670–1678. PubMed. <https://doi.org/10.1038/s41588-019-0512-x>
- Lee, S. H., Goddard, M. E., Wray, N. R., & Visscher, P. M. (2012). A Better Coefficient of Determination for Genetic Profile Analysis. *Genetic Epidemiology*, 36(3), 214–224. <https://doi.org/10.1002/gepi.21614>
- Levinson, D. F., Mostafavi, S., Milaneschi, Y., Rivera, M., Ripke, S., Wray, N. R., & Sullivan, P. F. (2014). Genetic studies of major depressive disorder: Why are there no genome-wide association study findings and what can we do about it? *Biological Psychiatry*, 76(7), 510–512. PubMed. <https://doi.org/10.1016/j.biopsych.2014.07.029>

- Macholdt, E., Arias, L., Duong, N. T., Ton, N. D., Van Phong, N., Schröder, R., Pakendorf, B., Van Hai, N., & Stoneking, M. (2020). The paternal and maternal genetic history of Vietnamese populations. *European Journal of Human Genetics*, 28(5), 636–645. <https://doi.org/10.1038/s41431-019-0557-4>
- Maramis, A., Van Tuan, N., & Minas, H. (2011). Mental health in southeast Asia. *The Lancet*, 377(9767), 700–702. [https://doi.org/10.1016/S0140-6736\(10\)62181-2](https://doi.org/10.1016/S0140-6736(10)62181-2)
- Martensen, L. K., Hahn, E., Cao, T. D., Schomerus, G., Nguyen, M. H., Böge, K., Nguyen, T. D., Mungee, A., Dettling, M., Angermeyer, M. C., & Ta, T. M. T. (2018). Impact of perceived course of illness on the desire for social distance towards people with symptoms of schizophrenia in Hanoi, Vietnam. *Psychiatry Research*, 268, 206–210. <https://doi.org/10.1016/j.psychres.2018.05.046>
- Martensen, L. K., Hahn, E., Duc, C. T., Schomerus, G., Böge, K., Dettling, M., Angermeyer, M. C., Nguyene, V. T., & Ta, T. M. T. (2020). Impact and differences of illness course perception on the desire for social distance towards people with symptoms of depression or schizophrenia in Hanoi, Vietnam. *Asian Journal of Psychiatry*, 50, 101973. <https://doi.org/10.1016/j.ajp.2020.101973>
- Martin, A. R., Gignoux, C. R., Walters, R. K., Wojcik, G. L., Neale, B. M., Gravel, S., Daly, M. J., Bustamante, C. D., & Kenny, E. E. (2017). Human Demographic History Impacts Genetic Risk Prediction across Diverse Populations. *American Journal of Human Genetics*, 100(4), 635–649. PubMed. <https://doi.org/10.1016/j.ajhg.2017.03.004>
- Martin, A. R., Kanai, M., Kamatani, Y., Okada, Y., Neale, B. M., & Daly, M. J. (2019). Clinical use of current polygenic risk scores may exacerbate health disparities. *Nature Genetics*, 51(4), 584–591. <https://doi.org/10.1038/s41588-019-0379-x>
- Martin, J., Tilling, K., Hubbard, L., Stergiakouli, E., Thapar, A., Davey Smith, G., O'Donovan, M. C., & Zammit, S. (2016). Association of Genetic Risk for Schizophrenia With Nonparticipation Over Time in a Population-Based Cohort Study. *American Journal of Epidemiology*, 183(12), 1149–1158. PubMed. <https://doi.org/10.1093/aje/kww009>

- McCarthy, S., Das, S., Kretzschmar, W., Delaneau, O., Wood, A. R., Teumer, A., Kang, H. M., Fuchsberger, C., Danecek, P., Sharp, K., Luo, Y., Sidore, C., Kwong, A., Timpson, N., Koskinen, S., Vrieze, S., Scott, L. J., Zhang, H., Mahajan, A., ... Haplotype Reference Consortium. (2016). A reference panel of 64,976 haplotypes for genotype imputation. *Nature Genetics*, *48*(10), 1279–1283. PubMed. <https://doi.org/10.1038/ng.3643>
- McGrath, J., Saha, S., Chant, D., & Welham, J. (2008). Schizophrenia: A Concise Overview of Incidence, Prevalence, and Mortality. *Epidemiologic Reviews*, *30*(1), 67–76. <https://doi.org/10.1093/epirev/mxn001>
- Mills, M. C., & Rahal, C. (2020). The GWAS Diversity Monitor tracks diversity by disease in real time. *Nature Genetics*, *52*(3), 242–243. <https://doi.org/10.1038/s41588-020-0580-y>
- Nguyen, T., Tran, T., Tran, H., Tran, T., & Fisher, J. (2019). The burden of clinically significant symptoms of common and severe mental disorders among adults in Vietnam: A population-based cross-sectional survey. *BMC Public Health*, *19*(1), 1173. <https://doi.org/10.1186/s12889-019-7513-7>
- Schizophrenia Working Group of the Psychiatric Genomics Consortium. (2014). Biological insights from 108 schizophrenia-associated genetic loci. *Nature*, *511*(7510), 421–427. <https://doi.org/10.1038/nature13595>
- Schizophrenia Working Group of the Psychiatric Genomics Consortium, Ripke, S., Walters, J. T., & O'Donovan, M. C. (2020). Mapping genomic loci prioritises genes and implicates synaptic biology in schizophrenia. *MedRxiv*, 2020.09.12.20192922. <https://doi.org/10.1101/2020.09.12.20192922>
- Ta, T. M. T., Böge, K., Cao, T. D., Schomerus, G., Nguyen, T. D., Dettling, M., Mungee, A., Martensen, L. K., Diefenbacher, A., Angermeyer, M. C., & Hahn, E. (2018). Public attitudes towards psychiatrists in the metropolitan area of Hanoi, Vietnam. *Asian Journal of Psychiatry*, *32*, 44–49. PubMed. <https://doi.org/10.1016/j.ajp.2017.11.031>

- Ta, T. M. T., Zieger, A., Schomerus, G., Cao, T. D., Dettling, M., Do, X. T., Mungsee, A., Diefenbacher, A., Angermeyer, M. C., & Hahn, E. (2016). Influence of urbanity on perception of mental illness stigma: A population based study in urban and rural Hanoi, Vietnam. *International Journal of Social Psychiatry*, 62(8), 685–695.  
<https://doi.org/10.1177/0020764016670430>
- Torkamani, A., Wineinger, N. E., & Topol, E. J. (2018). The personal and clinical utility of polygenic risk scores. *Nature Reviews Genetics*, 19(9), 581–590.  
<https://doi.org/10.1038/s41576-018-0018-x>
- Walker, E. R., McGee, R. E., & Druss, B. G. (2015). Mortality in Mental Disorders and Global Disease Burden Implications: A Systematic Review and Meta-analysis. *JAMA Psychiatry*, 72(4), 334–341. <https://doi.org/10.1001/jamapsychiatry.2014.2502>
